# Supplementary material for: The Effects Of Rf4 And The Genetic Mechanism Behind Fertility Restoration Of Wild Abortive Cytoplasmic Male Sterility (WA-CMS) In Japonica Rice (Oryza Sativa Ssp. Japonica)
Source: Research Square preprint supplement (doi:10.21203/rs.3.rs-1417941/v1), 2022-03-11
Supplement: Supplementary file 1 [file 5b59999d2055344a733ced86.docx]

Supplemental Table 1. Markers and primers used for gene mapping and sequencing

| Primer | Forward Primer (5′-3′) | Reverse Primer (5′-3′) | Purpose |
| --- | --- | --- | --- |
| STS10-27 | GCATTGGAATCAGTGTATCA | TAATGATAGATAGCAGATGT | Mapping |
| STS10-16 | CAGCAATCGGATCGCCTC | ATCTTTCCGTGATGGGAGGTA | Mapping |
| *Rf4-1* | TGAGGTGATCTGCTTGCTA | GCTGAAGTTGGAGTTGGA | Sequencing |
